# Supplementary material for: SLC25A46 is required for mitochondrial lipid homeostasis and cristae maintenance and is responsible for Leigh syndrome
Source: PubMed Central journal article supplement (PMC5009808; doi:10.15252/emmm.201506159), 2016-07-07
Supplement: EMMM-8-1019-s001.pdf [file EMMM-8-1019-s001.pdf]

## **Appendix**

### **Table of Contents**

1. Clinical history of the subject
2. Table S1. SLC25A46 proteins in the EMC complex identified in the BioID assay.
3. Table S2. Mass spectrometry analysis of mitochondrial phospholipid content in mitochondria isolated from control and subject fibroblasts.

## **Clinical History of the subject**

The pregnancy was marked by gestational diabetes treated with insulin, and by mild oligohydramnios. Birth was by spontaneous vaginal delivery at term. Meconial staining of amniotic fluid was noted. Birth weight was 2.55 kg (3<sup>rd</sup> percentile), length 48 cm (15-50%) and head circumference 34 cm (50%). Apgar scores were 6, 7 and 8 at 1, 5 and 10 minutes. The initial course was normal but at 4 hours of age she had a convulsion lasting for 20 seconds, which did not recur. An electrocardiogram and a chest radiogram were normal. Electroencephalography and cerebral CT scanning were normal. She was discharged after two days.

She was irritable child, with feeding difficulties suggesting gastroesophageal reflux. At 4 months of age, a pediatric neurologist noted constant developmental progress, irritability and difficulty sleeping at night. Examination revealed a weight of 5.8 kg (15%), length 58 cm (3%), head circumference 41.5 cm (55%) and mild hypertonia.

She was referred again at age 8.5 months for psychomotor delay and growth failure. She was thin and had mild spastic diplegia, but was alert and interacted appropriately with her surroundings. An ophthalmologist noted intermittent esotropia.

Laboratory assessment on admission included blood pH 7.43, pCO<sub>2</sub> 26.3 (normal: 34-45), bicarbonate 17 mmol/L (normal: 21-25), lactate 2.19 mmol/L (normal: 0.5-2.2), pyruvate 55 µmol/L (normal: 34-190), plasma sodium 140 mmol/L (normal: 130-142), potassium 4.7 mmol/L (normal: 3.6-6.2), chlorine 112 mmol/L (normal: 103-110). Plasma amino acid chromatography was normal, including alanine 274 µmol/L (normal: 182-396). Lumbar puncture revealed lactate 2.56 mmol/L (normal: 1.10-2.20) and pyruvate 136 µmol/L (normal: 34-125).

The subject had hypercalciuria but urinary amino acid excretion was normal and glucosuria was absent. She was treated with sodium bicarbonate. A fluoroscopic study of swallowing revealed a slow and somewhat uncoordinated oral phase, with nasopharygeal reflux of clear liquids and gagging with solids. A cerebral magnetic resonance (MRI) study was normal. Karyotype and an abdominal ultrasound were normal. At 11 months she was alert, had good ocular pursuit and improved head control but had definite motor delay.

At 13.5 months of age she was hospitalized for low-grade fever and vomiting. Two weeks later she was transferred to CHU Sainte-Justine. Soon after transfer, fever (39.5°C) and marked diaphoresis were noted. The patient had a convulsion. Sinus tachycardia (215/minute) and gasping respirations were noted. She was intubated. Cerebral computerized tomography showed multiple lesions in the cerebellar white matter, cerebellar peduncles and brain stem. Cerebral magnetic resonance imaging (MRI) confirmed lesions in the cerebellar hemispheres and periaqueductal grey matter, with mild involvement of the globi pallidi. These lesions were hypointense in T1-weighted and hyperintense in T2-weighted images. During this period, normal values were repeatedly obtained for lactate ( $1.87 \pm 0.22$  mmol/L, mean  $\pm$  SEM, n=8; range, 1.10-3.08) and pyruvate ( $79.6 \pm 8.9$   $\mu$ mol/L, mean  $\pm$  SEM, n=8; range 30-101). On histological examination, a muscle biopsy showed neurogenic atrophy and an absence of ragged red fibers. Liver biopsy morphology was normal.

The subject remained ventilator-dependent. Although she could spontaneously open her eyes, she showed no interaction with her surroundings. A neuro-ophthalmologic consultant reported pallor of the optic disks bilaterally. The maculae appeared normal. There was bilateral internuclear ophthalmoplegia, suggestive of involvement of the medial lateral fasciculus. A neurological consultant found hyperreflexia and mild spasticity. Electromyography and nerve conduction velocity testing were not performed. One month later, repeat cerebral MRI showed marked progression of lesions in the brain stem and midbrain, including the medial lateral fasciculus, and abnormalities of the thalami. The parents elected to stop life support measures and the patient died soon thereafter. Autopsy was declined.

During this patient's course, systemic signs and signs in organs other than brain were subtle or absent. The subject had mild, intermittent acidosis. Lactate and pyruvate were marginally elevated in the cerebrospinal fluid but not in blood. The uncoordinated swallowing, breathing abnormalities and the reduced level of consciousness that dominated the final stage of her course, and possibly the fever of unknown origin and tachycardia, can be explained by brain stem dysfunction. Together, the neurological signs, chronology of clinical events and the location and type of cerebral imaging abnormalities are diagnostic for Leigh Syndrome.

Only a small number of *SLC25A46*-deficient patients have been reported to date and our patient extends the clinical spectrum to include an important clinical presentation of mitochondrial disease, Leigh syndrome. The patient shows both similarities and important differences to the previous report. The combination of childhood-onset optic atrophy and hyperreflexia or spasticity in young adulthood recurred in different *SLC25A46*-deficient families. Our patient had pale optic disks, perhaps reflecting early optic atrophy, and had active deep tendon reflexes. These findings were minor compared with the patient's other neurological signs, and detailed testing of peripheral nerve and optic nerve function was not performed. It is possible that peripheral neuropathy or optic atrophy may have developed had the patient survived longer. Basal ganglion calcification, a feature of Leigh disease and of other mitochondrial disorders, was reported in a 44-year-old *SLC25A46*-deficient patient (Family IT), and our patient had abnormalities of the globi pallidi on MRI imaging at one year of age. In our patient, clinical signs were dominated by neurological signs related to abnormalities of the deep grey matter of the hindbrain. On cerebral MRI, these lesions had the typical distribution, symmetry and T2-weighted hyperintense, T1-weighted hypointense characteristics of Leigh disease. Leigh disease was not previously diagnosed in *SLC25A46*-deficient patients. However, the patient of Family US was abnormal at birth, showed progressive atrophy of the cerebellum and brainstem and required endotracheal intubation and respiratory support. Although the diagnosis of Leigh syndrome was not mentioned in relation to that patient, these clinical signs are compatible.

**SLC25A46 partner proteins identified in bio ID**

|             | <b>alternative name</b> | <b>yeast homologue</b> | <b>number of spectra</b> | <b>fold change</b> |
|-------------|-------------------------|------------------------|--------------------------|--------------------|
| <b>EMC1</b> | KIAA0090                | YCL045C-EMC1           | 33                       | 88                 |
| <b>EMC2</b> | KIAA0103-TTC35          | YJR088C-EMC2           | 9.5                      | 76                 |
| <b>EMC3</b> | TMEM111                 | YKL207W-AIM27          | 7.5                      | 60                 |
| <b>EMC4</b> | TMEM85                  | YGL231C-EMC4           | 2                        | 20                 |
| <b>EMC5</b> | MMGT1-TMEM32            | YIL027C                | 3.5                      | 35                 |
| <b>EMC6</b> | TMEM93                  | YLL014W                | 2                        | 10                 |
| <b>EMC7</b> | C15orf24                |                        | 3                        | 30                 |
| <b>EMC8</b> | FAM158B-COX4NB          |                        | 3.5                      | 35                 |
| <b>EMC9</b> | FAM158A                 |                        | 0.5                      | 5                  |

Supplementary table 2: analysis of mitochondrial lipid content by mass spectrometry

| Lipid class | Compound name | RT       | Mass     | Normalized intensities with internal standards |          |          |          |          |          |
|-------------|---------------|----------|----------|------------------------------------------------|----------|----------|----------|----------|----------|
|             |               |          |          | control                                        |          |          | subject  |          |          |
|             |               |          |          | exp 1                                          | exp 2    | exp 3    | exp 1    | exp 2    | exp 3    |
| PA          | PA 36:4       | 20.60    | 714.507  | 60685                                          | 25834    | 32744    | 7903     | 5462     | 2898     |
|             | PA 38:5       | 20.50    | 740.522  | 172476                                         | 69934    | 101546   | 87481    | 56017    | 49057    |
|             | PA 40:6       | 20.74    | 766.538  | 17824                                          | 10463    | 14816    | 6292     | 7072     | 2857     |
| PC          | PC 28:0       | 17.86    | 677.5013 | 30288593                                       | 26750337 | 29454248 | 27253616 | 27893141 | 29263629 |
|             | PC 30:0       | 21.19    | 705.5322 | 7600828                                        | 3762276  | 5498484  | 4408347  | 2936940  | 3875674  |
|             | PC 32:0       | 24.90    | 733.5635 | 10236348                                       | 8787419  | 9064997  | 10683570 | 7675029  | 8432108  |
|             | PC 34:0       | 28.82    | 761.5942 | 2394438                                        | 1758069  | 2233349  | 3476974  | 2068990  | 3206507  |
|             | PC 34:1       | 25.55    | 759.5798 | 151614961                                      | 84752035 | 95515006 | 98149437 | 69581373 | 80620110 |
|             | PC 34:2-1     | 22.52    | 757.5635 | 16500000                                       | 8502535  | 9288359  | 4760373  | 3900839  | 3563773  |
|             | PC 34:2-2     | 22.84    | 757.5634 | 24407489                                       | 11609660 | 13747304 | 10497914 | 7598114  | 8364716  |
|             | PC 34:3-1     | 20.48    | 755.5464 | 2220103                                        | 1075898  | 915481   | 502061   | 603587   | 380020   |
|             | PC 34:3-2     | 21.40    | 755.5467 | 375942                                         | 70477    | 171871   | 388539   | 110714   | 256266   |
|             | PC 34:4       | 19.04    | 753.5311 | 195633                                         | 97687    | 92856    | 101759   | 79941    | 94540    |
|             | PC 36:0       | 32.90    | 789.6249 | 278488                                         | 259320   | 271950   | 315941   | 280791   | 308149   |
|             | PC 36:1-1     | 29.49    | 787.611  | 33098525                                       | 16524995 | 24100831 | 31766423 | 19647165 | 26072165 |
|             | PC 36:1-2     | 29.51    | 809.5912 | 4393687                                        | 2109442  | 3309092  | 4290579  | 2388156  | 3352801  |
|             | PC 36:2       | 26.18    | 785.5956 | 83796948                                       | 45686219 | 52805741 | 63001988 | 40596514 | 49310166 |
|             | PC 36:3-1     | 23.49    | 783.5785 | 8070360                                        | 5108161  | 4915669  | 2953936  | 2498469  | 2578074  |
|             | PC 36:3-2     | 23.97    | 783.5784 | 2823300                                        | 1698070  | 1659878  | 1467367  | 1588717  | 1380070  |
|             | PC 36:3-3     | 24.98    | 783.5785 | 8070360                                        | 5108161  | 4915669  | 2953936  | 2498469  | 2578074  |
|             | PC36:4-1      | 21.09    | 781.5626 | 344154                                         | 187250   | 196196   | 37754    | 55937    | 89781    |
|             | PC36:4-2      | 22.45    | 781.5626 | 2633207                                        | 3068697  | 1647858  | 2984177  | 2473769  | 1503811  |
|             | PC 36:5-1     | 19.67    | 779.5463 | 127367                                         | 205157   | 119007   | 127153   | 132203   | 166672   |
|             | PC 36:5-2     | 20.31    | 779.5467 | 662783                                         | 593050   | 396801   | 129909   | 307426   | 301575   |
|             | PC 38:0       | 35.83    | 817.6582 | 33397389                                       | 28955291 | 32360598 | 30042170 | 28704480 | 32833294 |
|             | PC 38:1       | 33.25    | 815.644  | 519732.7159                                    | 388808   | 399717   | 597470   | 473468   | 613009   |
|             | PC 38:2       | 29.89    | 813.6254 | 4150424                                        | 2437281  | 2942213  | 4016812  | 2838888  | 3599106  |
|             | PC 38:3-3     | 28.83    | 811.6094 | 695921                                         | 643283   | 411481   | 1294024  | 1570531  | 821461   |
|             | PC 38:3-1     | 27.01    | 811.6085 | 1840702                                        | 780384   | 1150261  | 1379398  | 909207   | 1150303  |
|             | PC 38:3-2     | 27.81    | 811.6094 | 695921                                         | 643283   | 411481   | 1294024  | 1570531  | 821461   |
|             | PC 38:4-1     | 24.62    | 809.5933 | 949957                                         | 783407   | 568661   | 592811   | 400601   | 479964   |
|             | PC 38:4-2     | 25.55    | 809.594  | 173770                                         | 119820   | 96127    | 467055   | 323035   | 272896   |
|             | PC 38:5       | 23.06    | 807.5784 | 2599013                                        | 2893778  | 1469453  | 3149151  | 3151787  | 1995513  |
|             | PC 38:6-1     | 20.87    | 805.5622 | 351349                                         | 341486   | 76103    | 174563   | 107682   | 116089   |
|             | PC 38:6-2     | 21.78    | 805.5618 | 731730                                         | 555350   | 390149   | 723371   | 523718   | 407320   |
|             | PC 40:4-1     | 28.43    | 837.625  | 243824                                         | 183208   | 142275   | 526339   | 385991   | 447548   |
|             | PC 40:4-2     | 29.02    | 837.6251 | 86407                                          | 74906    | 55147    | 346947   | 259501   | 251267   |
|             | PC 40:5       | 25.79    | 835.6092 | 335502                                         | 269107   | 270631   | 456452   | 416612   | 376287   |
|             | PC 40:6       | 26.60    | 835.609  | 602706                                         | 514019   | 322769   | 887301   | 597717   | 487930   |
|             | PC 40:6-1     | 23.47    | 833.5933 | 461897                                         | 403991   | 254528   | 428030   | 509816   | 388169   |
|             | PC 40:6-2     | 25.44    | 833.5936 | 457275                                         | 522769   | 258387   | 959547   | 752157   | 579259   |
|             | PC 40:7-1     | 22.37    | 831.5778 | 928694                                         | 684036   | 504382   | 902260   | 728516   | 692531   |
|             | PC 40:7-2     | 25.45    | 831.577  | 296816                                         | 346500   | 174828   | 700499   | 468727   | 413796   |
| PCO-34:0    | 31.22         | 747.6143 | 428564   | 386790                                         | 488182   | 1089299  | 534144   | 1026457  |          |
| PCO-34:1    | 27.68         | 745.5992 | 3499736  | 2843087                                        | 3267215  | 7891421  | 5625466  | 6978227  |          |
| PCO-34:2    | 24.97         | 743.5818 | 796712   | 482354                                         | 659312   | 939886   | 741939   | 1023581  |          |
| PCO-36:2    | 28.33         | 771.614  | 946858   | 400041                                         | 662468   | 1316121  | 1331859  | 1731729  |          |
| PCO-36:4    | 24.52         | 767.5825 | 552674   | 777093                                         | 447338   | 1676890  | 1361067  | 1307435  |          |
| PCO-38:3    | 27.57         | 819.6117 | 68230    | 69024                                          | 54741    | 351823   | 200977   | 212535   |          |
| PCO-38:4    | 28.42         | 795.6138 | 291273   | 292330                                         | 275687   | 906748   | 519504   | 588285   |          |
| PCO-38:5    | 25.04         | 793.5984 | 505490   | 710685                                         | 404405   | 2434663  | 1694874  | 1865241  |          |
| PCO-38:6    | 23.76         | 791.5822 | 154963   | 167483                                         | 116247   | 579783   | 298572   | 365233   |          |
| PCO-40:5    | 28.75         | 821.6287 | 95710    | 79015                                          | 83421    | 244871   | 124676   | 170325   |          |
| PE          | PE 32:0       | 25.60    | 690.508  | 14358                                          | 12205    | 12301    | 8737     | 8762     | 7567     |
|             | PE 32:1       | 22.58    | 689.5    | 160734                                         | 88882    | 87008    | 58086    | 50147    | 48279    |
|             | PE 34:1       | 26.30    | 717.5315 | 2597416                                        | 1220275  | 1484279  | 1117688  | 804460   | 631115   |
|             | PE 34:2       | 23.21    | 715.5168 | 876275                                         | 413793   | 526343   | 262417   | 287599   | 162814   |
|             | PE 36:0       | 30.25    | 747.578  | 305374                                         | 192071   | 187564   | 194706   | 153936   | 149926   |
|             | PE 36:1       | 30.27    | 745.5611 | 3584032                                        | 2394524  | 2443527  | 2459961  | 2767012  | 1829527  |
|             | PE 36:2       | 26.94    | 743.5473 | 5303111                                        | 2587362  | 3462088  | 2323298  | 1579121  | 1288591  |
|             | PE 36:3       | 24.20    | 741.5323 | 451459                                         | 199133   | 273698   | 94828    | 80197    | 132329   |
|             | PE 36:4       | 23.14    | 739.516  | 216363                                         | 160472   | 152323   | 141466   | 116958   | 72301    |
|             | PE 38:2       | 30.68    | 771.578  | 129252                                         | 100277   | 116226   | 97029    | 73320    | 74349    |
|             | PE 38:3       | 28.51    | 769.562  | 174590                                         | 115506   | 88671    | 52589    | 46874    | 47717    |
|             | PE 38:5       | 26.95    | 767.5454 | 1719228                                        | 1320374  | 1138245  | 2067334  | 1314448  | 946184   |
|             | PE 38:6       | 22.44    | 763.5194 | 165914                                         | 146691   | 79382    | 99286    | 92759    | 47951    |
|             | PE 40:6       | 26.16    | 791.5493 | 655732                                         | 445826   | 426914   | 565333   | 550095   | 460722   |
|             | PS            | PS 34:1  | 22.47    | 761.5197                                       | 463142   | 384863   | 315631   | 322942   | 367380   |
| PS 34:2     |               | 19.70    | 758.498  | 32718                                          | 28963    | 23247    | 19234    | 14331    | 17003    |
| PS 36:1     |               | 23.05    | 788.543  | 166340                                         | 118985   | 100456   | 117853   | 95189    | 71152    |
| PS 36:0     |               | 23.69    | 791.5658 | 840928                                         | 413714   | 452531   | 391666   | 373276   | 383448   |
| PS 40:6     |               | 22.44    | 835.5345 | 349581                                         | 262252   | 231377   | 255077   | 251535   | 213744   |
