# Supplementary material for: SLC25A46 is required for mitochondrial lipid homeostasis and cristae maintenance and is responsible for Leigh syndrome
Source: PubMed Central journal article supplement (PMC5009808; doi:10.15252/emmm.201506159), 2016-07-07
Supplement: EMMM-8-1019-s002.pdf [file EMMM-8-1019-s002.pdf]

## Expanded View Figures

|          | PX(D,E)XX(K,R)           |                          |                          |
|----------|--------------------------|--------------------------|--------------------------|
|          | PCD1                     | PCD2                     | PCD3                     |
| SLC25A1  | 45PTEYVK <sub>50</sub>   | 142PMETIK <sub>147</sub> | 240PLDVIK <sub>245</sub> |
| SLC25A4  | 28PIERVK <sub>33</sub>   | 133PLDFAR <sub>138</sub> | 230PFDTV <sub>235</sub>  |
| SLC25A7  | 33PLDTAK <sub>38</sub>   | 133PTEVVK <sub>138</sub> | 232PVDVVK <sub>237</sub> |
| SLC25A46 | 119PCIVLR <sub>124</sub> | 215PFYSAS <sub>220</sub> | 333PLETVL <sub>338</sub> |
| MTCH1    | 98PLLYVK <sub>103</sub>  | 214PLHVIS <sub>219</sub> | 327PFLLVG <sub>332</sub> |
| MTCH2    | 20PLMYVK <sub>25</sub>   | 140PFHVIT <sub>145</sub> | 236PFVLVS <sub>241</sub> |

**Figure EV1. Sequences of the putative functional carrier (PCD) domains in three typical mitochondrial metabolite carrier proteins, SLC25A46, MTCH1, and MTCH2.**

The consensus sequence is shown at the top of the figure. SLC25A1 is the citrate carrier, SLC25A4 is the adenine nucleotide translocase, and SLC25A7 is a proton carrier (uncoupling protein 1).

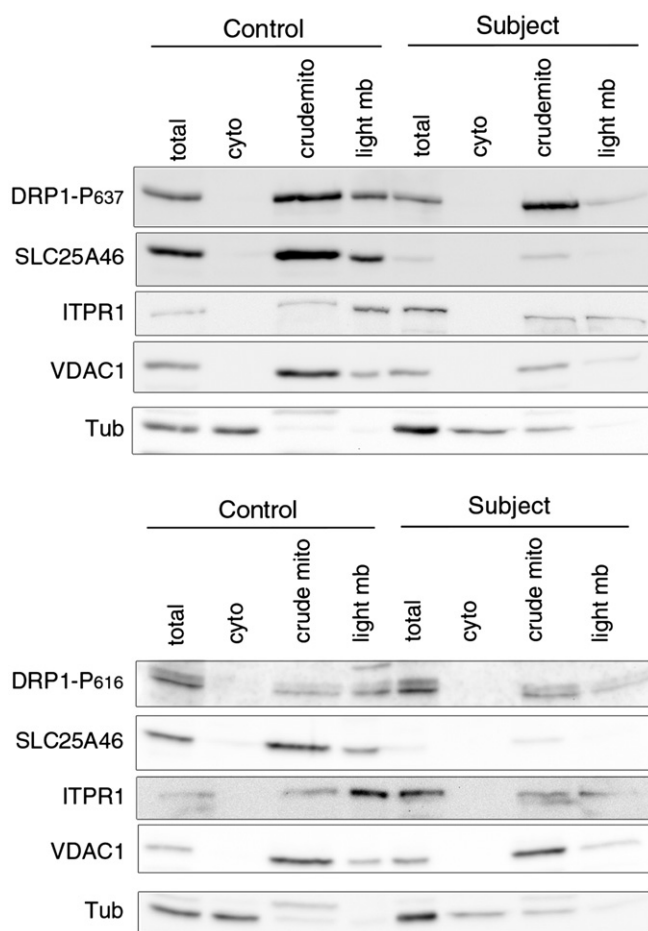

**Figure EV2. Role of SLC25A46 in mitochondrial recruitment of phosphorylated forms of DRP1.**

Immunoblot analysis of the localization of phosphorylated forms of DRP1 in control and subject fibroblasts after subcellular fractionation. Upper panel: DRP1 phosphorylated on serine 637. Bottom panel: DRP1 phosphorylated on serine 616. ITPR1 was used as an ER marker, VDAC1 as a mitochondrial marker, and alpha-tubulin as a cytosolic marker.

Source data are available online for this figure.
