# Supplementary material for: SLC25A46 is required for mitochondrial lipid homeostasis and cristae maintenance and is responsible for Leigh syndrome
Source: PubMed Central journal article supplement (PMC5009808; doi:10.15252/emmm.201506159), 2016-07-07

# Figure 1 raw data

## Figure 1C

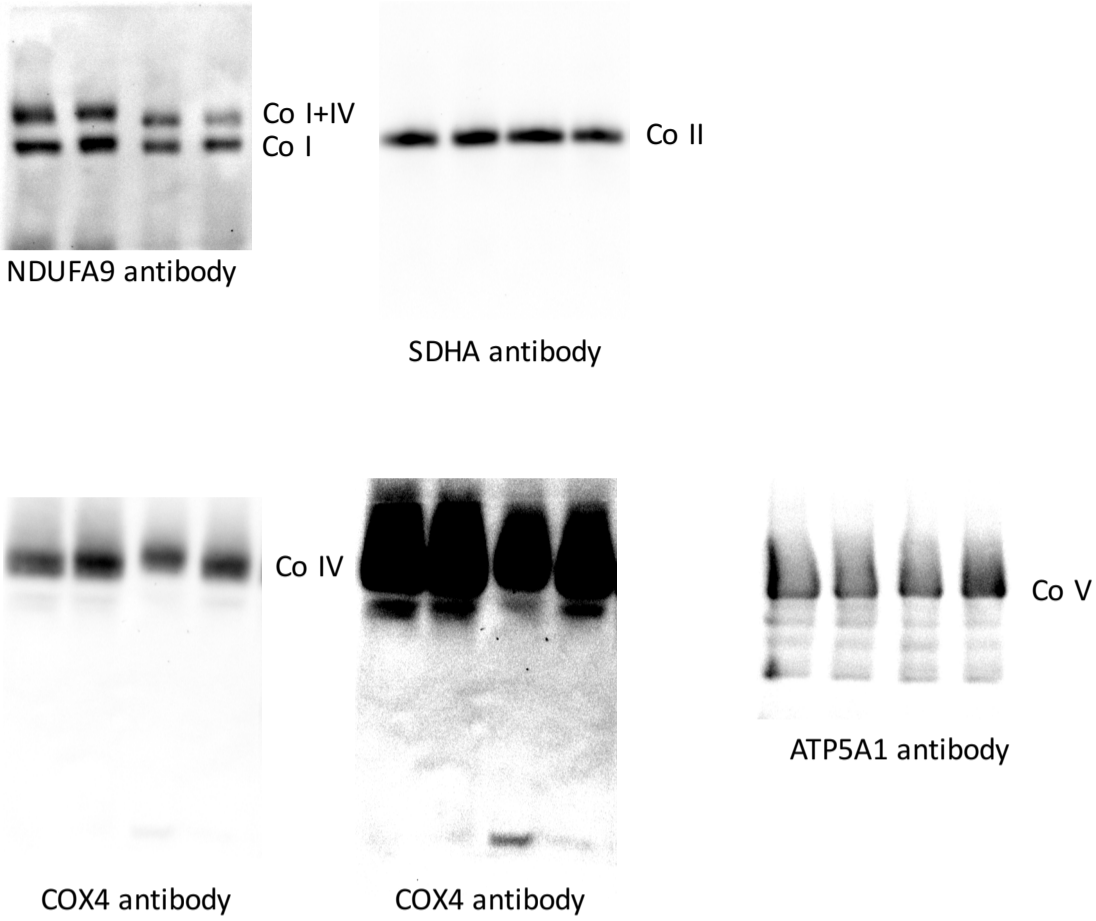

## Figure 1D

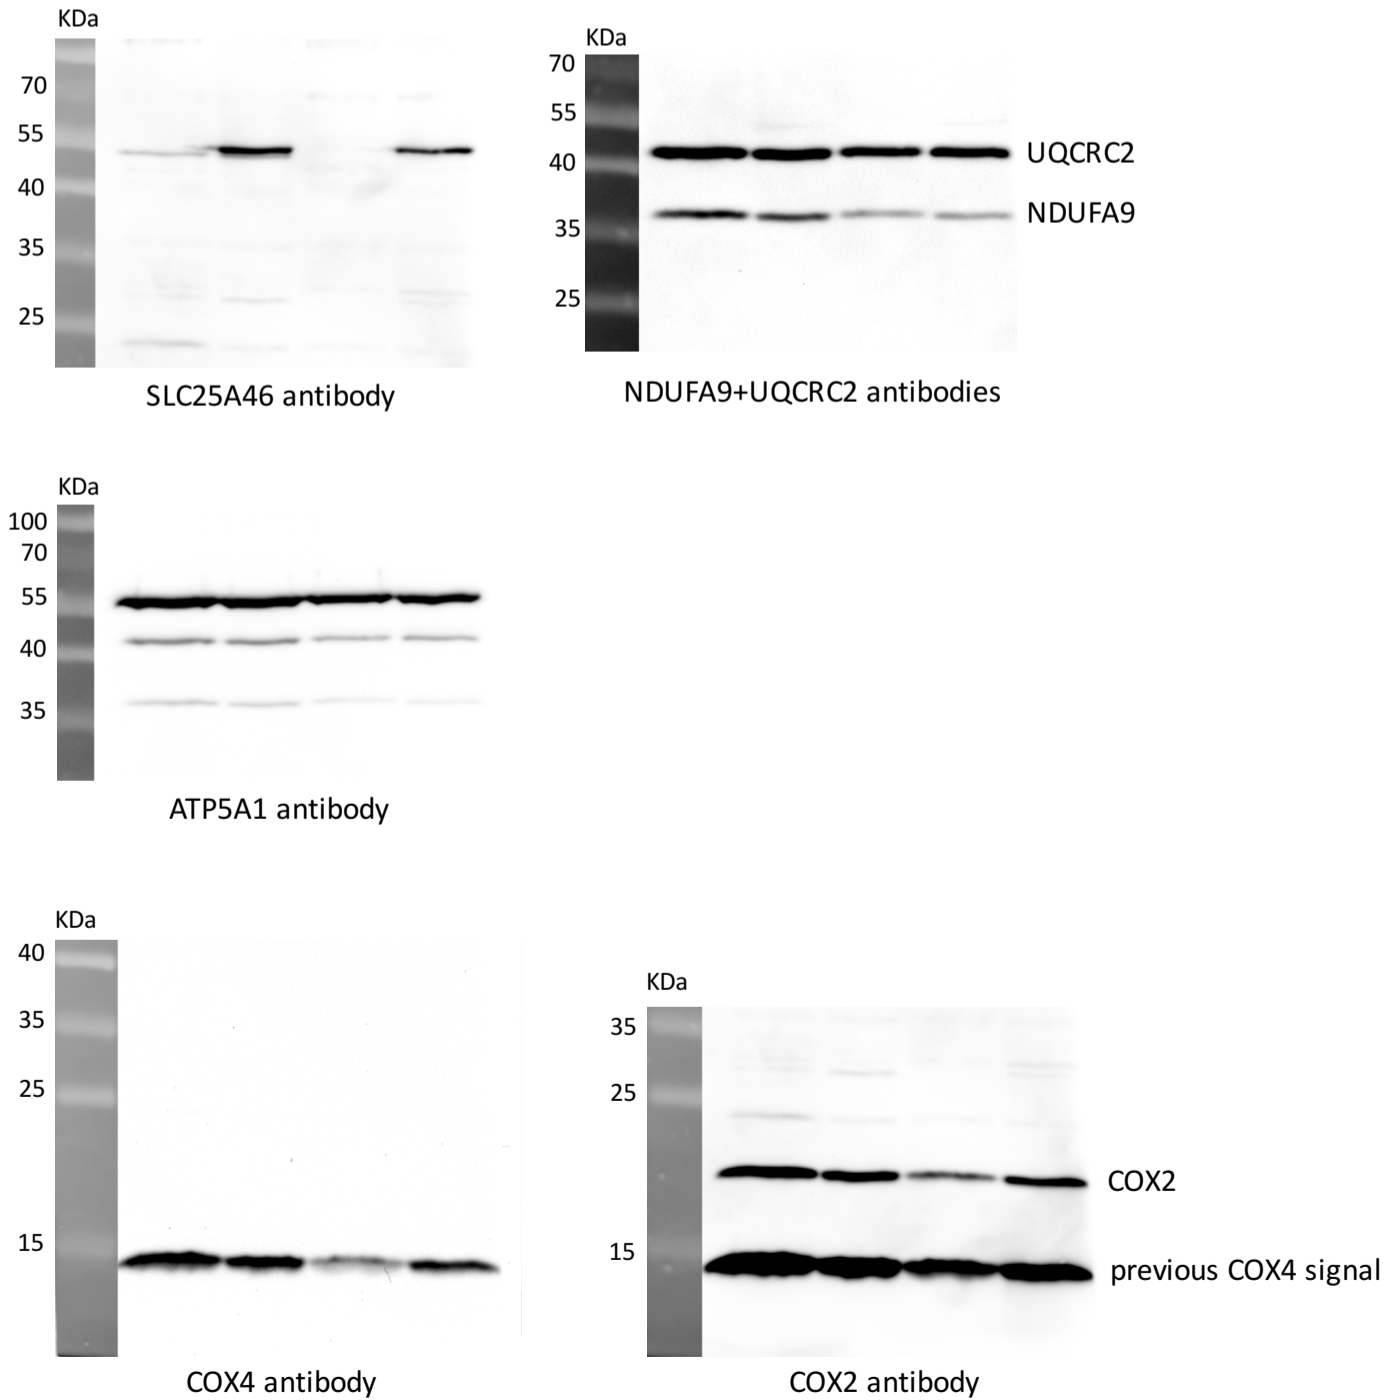

Supplement: EMMM-8-1019-s003.pdf [file EMMM-8-1019-s003.pdf]
