# Supplementary material for: SLC25A46 is required for mitochondrial lipid homeostasis and cristae maintenance and is responsible for Leigh syndrome
Source: PubMed Central journal article supplement (PMC5009808; doi:10.15252/emmm.201506159), 2016-07-07

Figure 2 raw data

Figure 2A

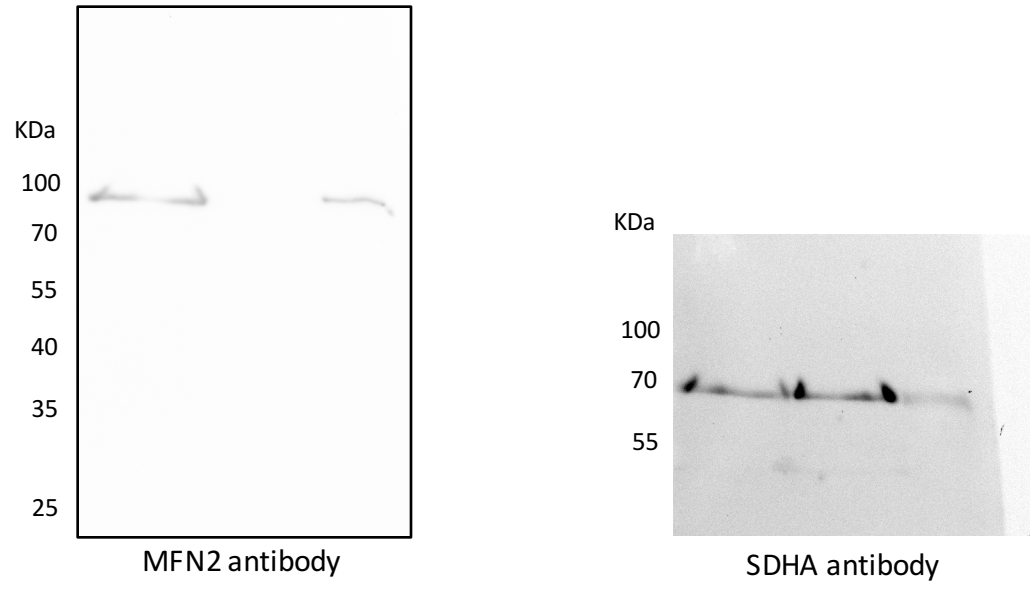

Figure 2B

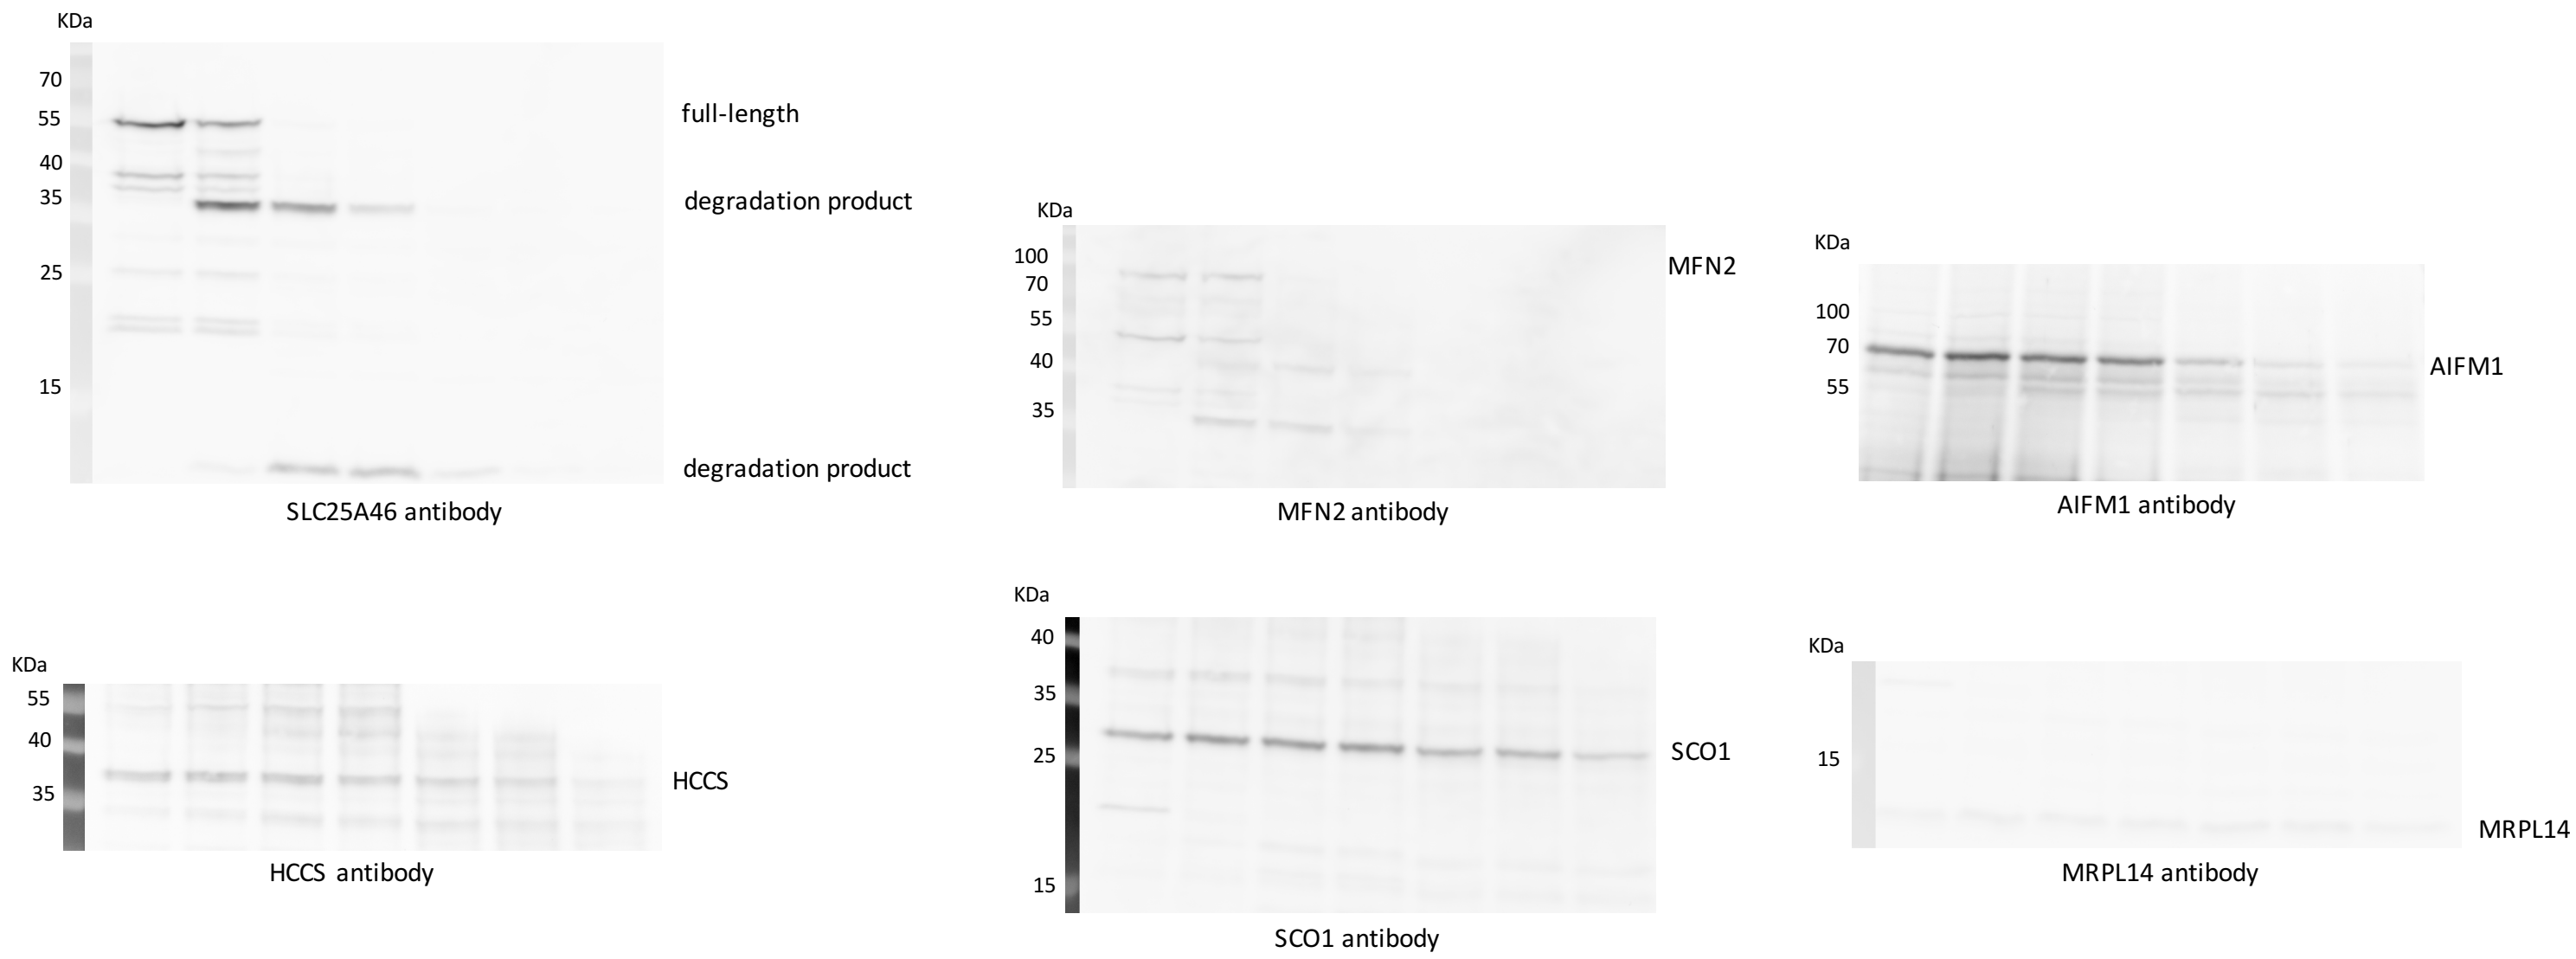

Figure 2C

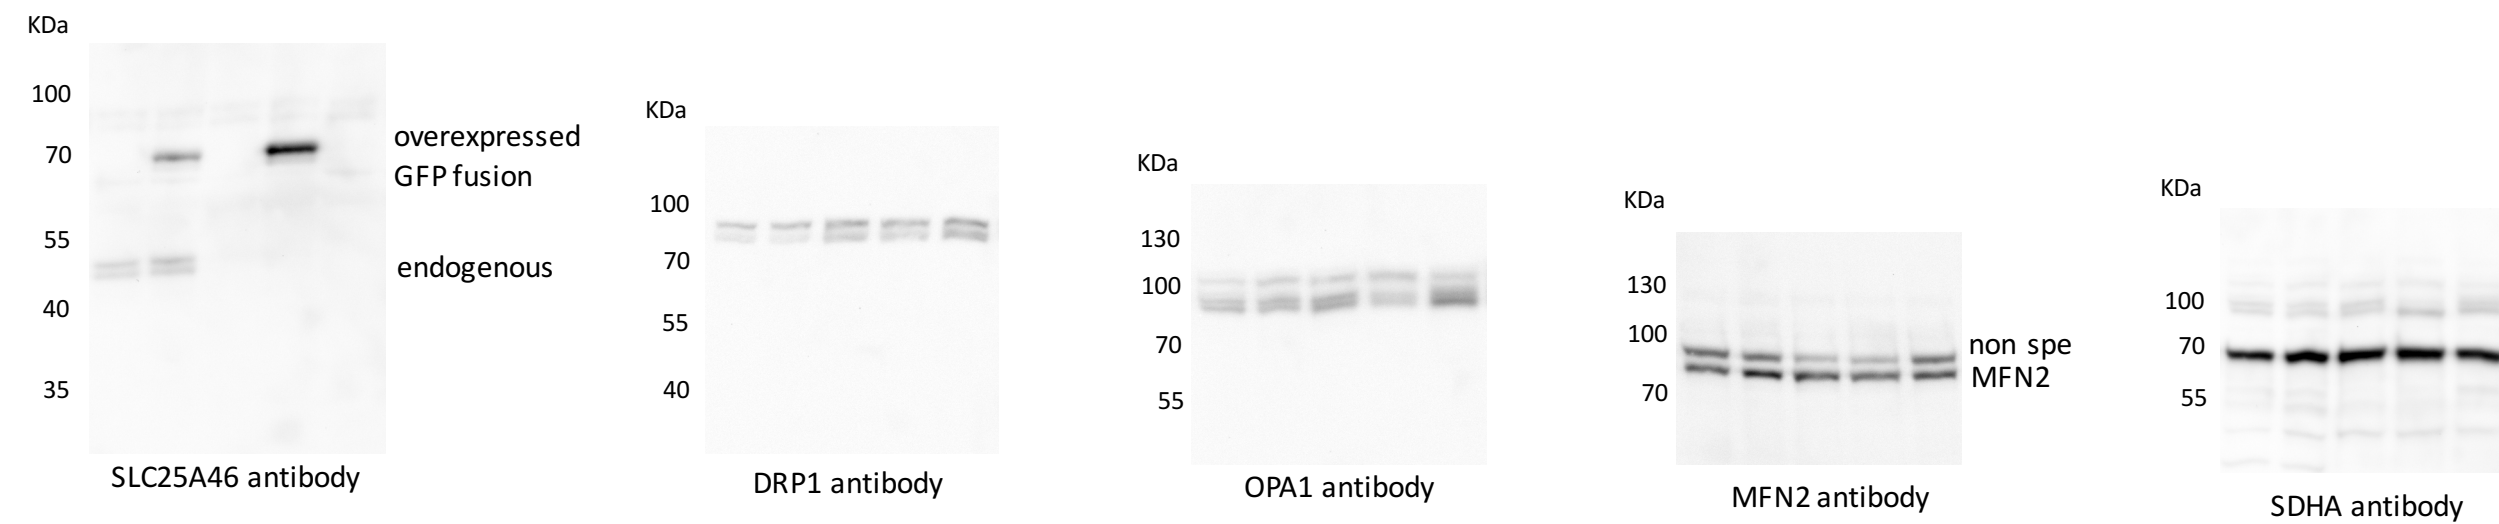

Supplement: EMMM-8-1019-s004.pdf [file EMMM-8-1019-s004.pdf]
