# Supplementary material for: SLC25A46 is required for mitochondrial lipid homeostasis and cristae maintenance and is responsible for Leigh syndrome
Source: PubMed Central journal article supplement (PMC5009808; doi:10.15252/emmm.201506159), 2016-07-07
Supplement: EMMM-8-1019-s005.pdf [file EMMM-8-1019-s005.pdf]

Figure 3 raw data

Figure 3C

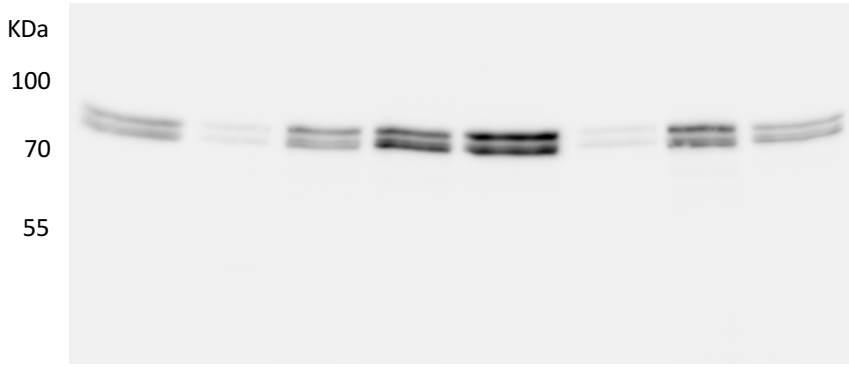

DRP1 antibody

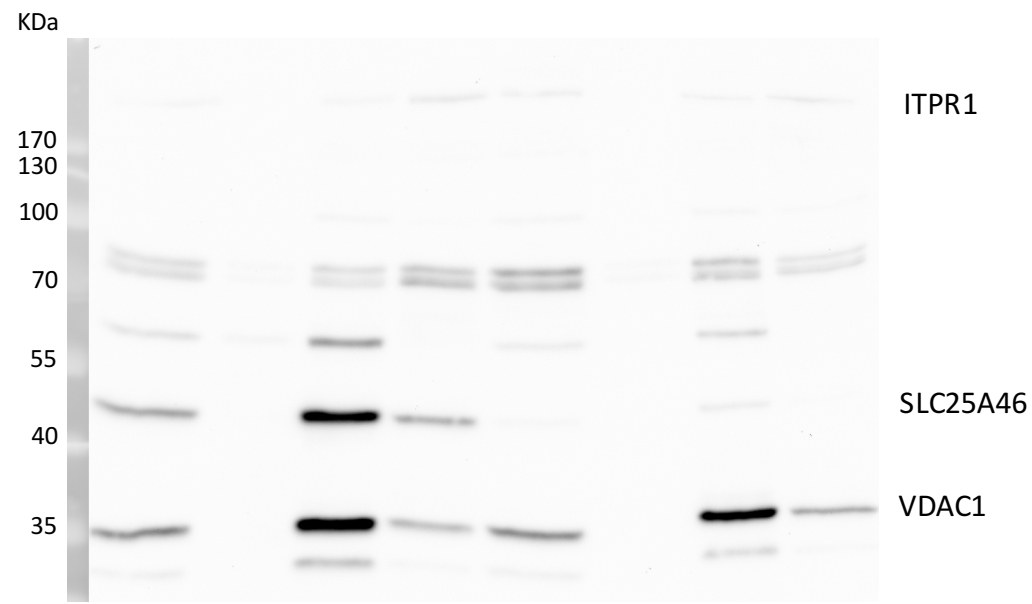

ITPR1, SLC25A46 and VDAC1 antibodies

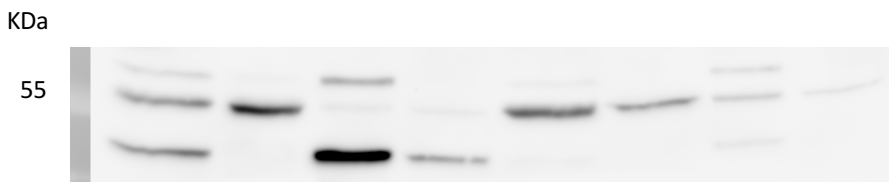

Tubulin antibody

Figure 3D

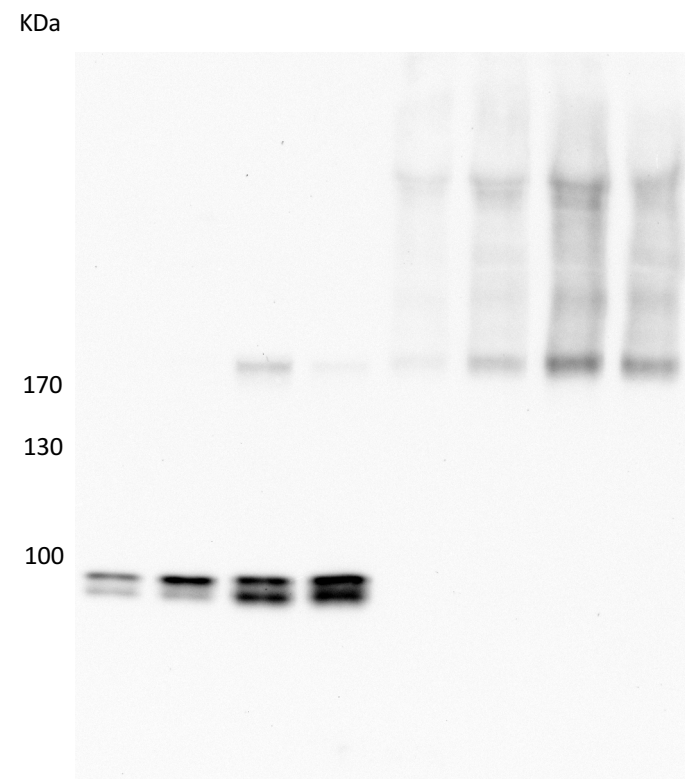

DRP1 antibody

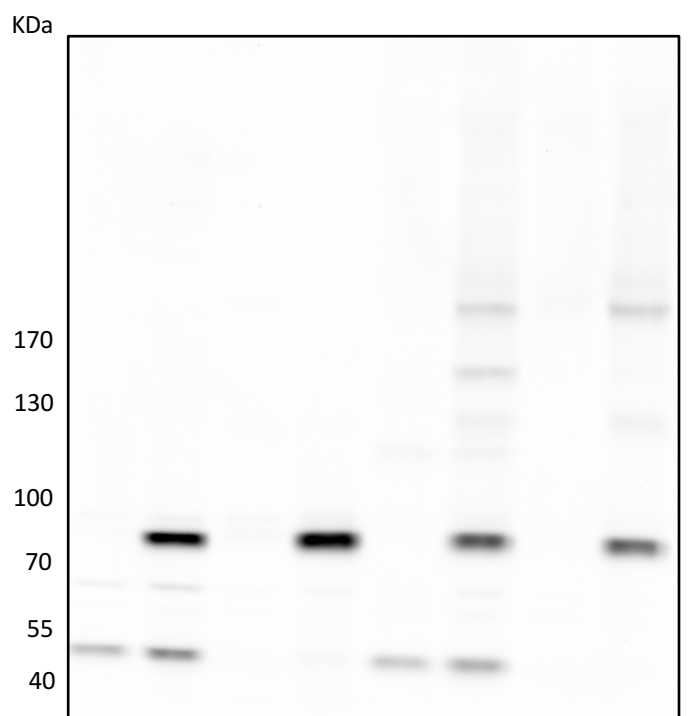

SLC25A46 antibody

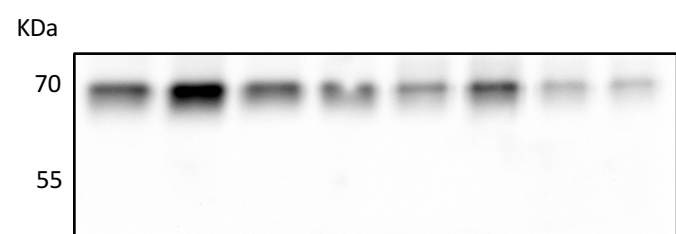

SDHA antibody
