# Supplementary material for: SLC25A46 is required for mitochondrial lipid homeostasis and cristae maintenance and is responsible for Leigh syndrome
Source: PubMed Central journal article supplement (PMC5009808; doi:10.15252/emmm.201506159), 2016-07-07

# Figure 4 raw data

## Figure 4D

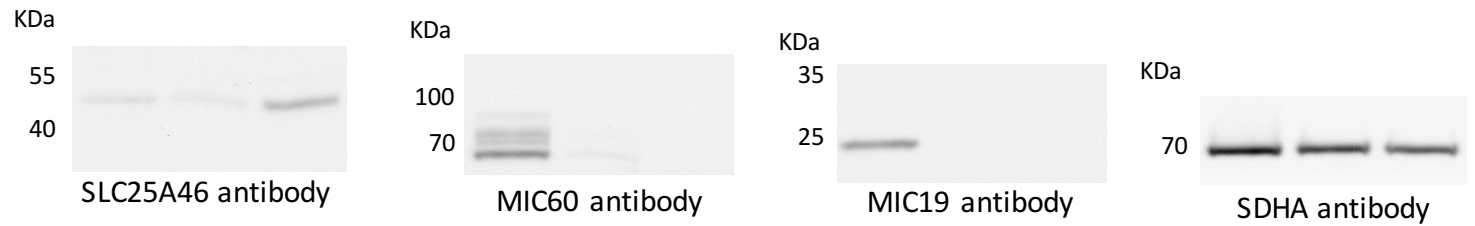

## Figure 4E

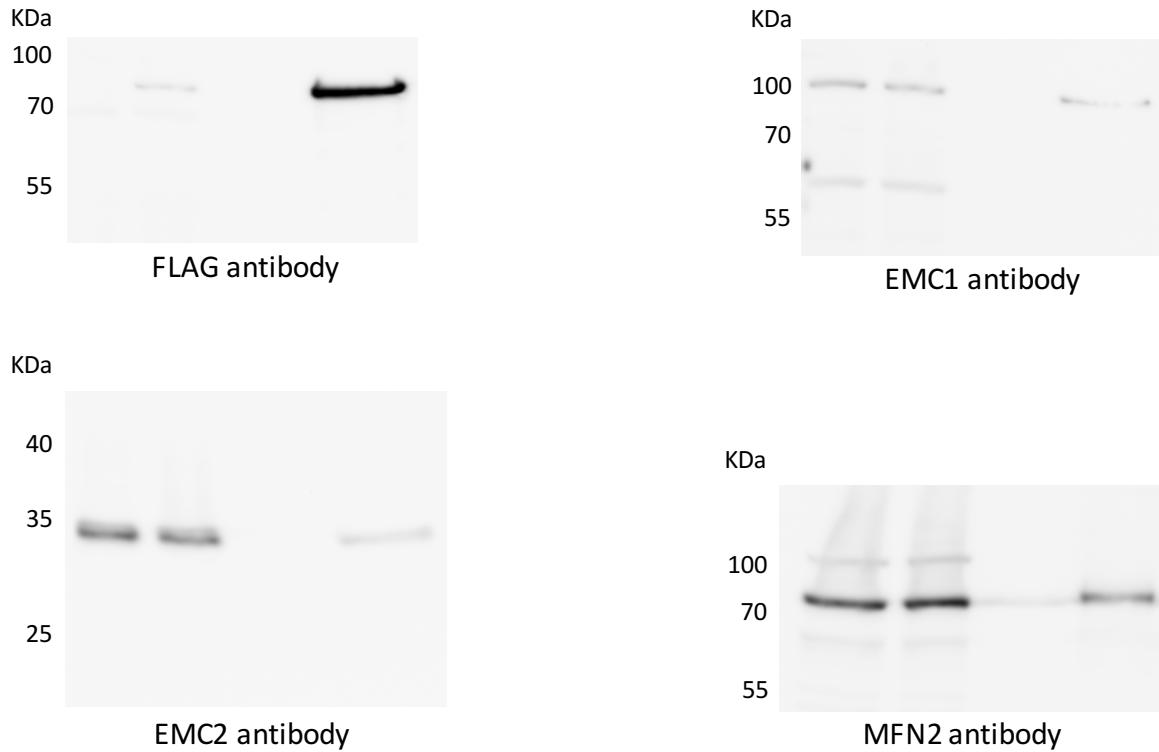

Supplement: EMMM-8-1019-s006.pdf [file EMMM-8-1019-s006.pdf]
