# Supplementary material for: SLC25A46 is required for mitochondrial lipid homeostasis and cristae maintenance and is responsible for Leigh syndrome
Source: PubMed Central journal article supplement (PMC5009808; doi:10.15252/emmm.201506159), 2016-07-07
Supplement: EMMM-8-1019-s009.pdf [file EMMM-8-1019-s009.pdf]

## **SLC25A46 is required for mitochondrial lipid homeostasis and cristae maintenance and is responsible for Leigh syndrome**

Alexandre Janer, Julien Prudent, Vincent Paupe, Somayyeh Fahiminiy, Jacek Majewski, Nicolas Sgarioto, Christine Des Rosiers, Anik Forest, Zhen-Yuan Lin, Anne-Claude Gingras, Grant Mitchell, Heidi M. McBride, Eric A. Shoubridge

*Corresponding author: Eric A. Shoubridge, McGill University*

---

### **Review timeline:**

|                     |                  |
|---------------------|------------------|
| Submission date:    | 21 December 2015 |
| Editorial Decision: | 12 January 2016  |
| Revision received:  | 21 April 2016    |
| Editorial Decision: | 19 May 2016      |
| Revision received:  | 02 June 2016     |
| Editorial Decision: | 06 June 2016     |
| Revision received:  | 07 June 2016     |
| Accepted:           | 09 June 2016     |

---

### **Transaction Report:**

(Note: With the exception of the correction of typographical or spelling errors that could be a source of ambiguity, letters and reports are not edited. The original formatting of letters and referee reports may not be reflected in this compilation.)

*Editor: Roberto Buccione*

1st Editorial Decision

12 January 2016

---

Thank you for the submission of your manuscript to EMBO Molecular Medicine. We have now heard back from the three very expert Reviewers whom we asked to evaluate your manuscript.

As you will see, all three Reviewers highly praise the superb technical quality and rigor of your experimentation and recognise that the evidence supports the conclusions. However, Reviewers 1 and 2 note on one hand the somewhat compromised novelty and on the other that the mechanistic implications of your findings, which could have represented a significant advance with respect to the Nature Genetics paper, remain underdeveloped. I should add that these reservations reflect my very own when I made an initial editorial decision to send the manuscript out for peer-review. The reviewers also list a number of other issues.

In conclusion, while publication of the paper cannot be considered at this stage, given the potential interest of your findings and after internal discussion, we have decided to give you the opportunity to address the criticisms.

We are thus prepared to consider a substantially revised submission, with the understanding that the Reviewers' concerns must be addressed with additional experimental data where appropriate and that acceptance of the manuscript will entail a second round of review. The overall aim is to

significantly upgrade relevance and conclusiveness, especially with respect to the pathomechanisms. For instance, Reviewer 2 suggests some possible approaches in that respect and suggests provision of additional clinical characterisation.

I understand that if you do not have the required data available at least in part, to address the above, this might entail a significant amount of time, additional work and experimentation. I would therefore understand if you chose to rather seek publication elsewhere at this stage. Should you decide to do so, and we hope not, we would welcome a message to this effect.

Please note that it is EMBO Molecular Medicine policy to allow a single round of revision only and that, therefore, acceptance or rejection of the manuscript will depend on the completeness of your responses included in the next, final version of the manuscript.

EMBO Molecular Medicine now requires a complete author checklist (<http://embomolmed.embopress.org/authorguide#editorial3>) to be submitted with all revised manuscripts. Provision of the author checklist is mandatory at revision stage; The checklist is designed to enhance and standardize reporting of key information in research papers and to support reanalysis and repetition of experiments by the community. The list covers key information for figure panels and captions and focuses on statistics, the reporting of reagents, animal models and human subject-derived data, as well as guidance to optimise data accessibility. This checklist especially relevant in this case given the issues raised with respect to statistical treatment and animal numbers.

As you know, EMBO Molecular Medicine has a "scooping protection" policy, whereby similar findings that are published by others during review or revision are not a criterion for rejection. However, I do ask you to get in touch with us after three months if you have not completed your revision, to update us on the status. Please also contact us as soon as possible if similar work is published elsewhere.

I also suggest that you carefully adhere to our guidelines for publication in your next version, including our new requirements for supplemental data (see also below) to speed up the pre-acceptance process in case of a positive outcome.

\*\*\*\*\* Reviewer's comments \*\*\*\*\*

Referee #1 (Comments on Novelty/Model System):

There is only one model system. Immortalized human fibroblasts.

Referee #1 (Remarks):

The manuscript by Janer and colleagues investigates the role of SLC25A46 mutations as the cause of Leigh syndrome in a French Canadian consanguineous family. Whole exome- sequence identified a homozygote missense T142I mutation in SLC25A46. They show that SLC25A46 is drastically decreased in fibroblasts from the affected subjects. These cells had mild respiratory defects with complex IV decrease. They also had highly increased mitochondrial length, suggesting hyperfusion. It appears that Drp1 was recruited to the mitochondrial surface but that fission failed to be activated, despite an increase of Opa1 short isoforms. TEM detected profound changes in the morphology of mitochondria cristae, which were either absent or reduced in length or present in parallel stacks. Patient's fibroblasts had markedly reduced amounts of MICOS components. Using a combination of silencing and transgenic approaches, the authors convincingly demonstrated that the homozygote mutation in SLC25A46 caused protein destabilization, leading to MICOS disassembly and degradation. The results confirm that SLC25A46 is necessary for MICOS maintenance and normal cristae structure. Taken together the data further support the notion that SLC25A46 is a mammalian ortholog of yeast Ugo1. They also reaffirm that mutations in SLC25A46 cause mitochondrial syndromes. There are two novel aspects in the study, which have not been previously addressed by others. First is the interaction of SLC25A46 with EMC complex that was identified using a BioID strategy. These interactions may suggest that SLC25A46 is somehow involved in lipid transfer from the ER to mitochondria. Second is the increase of markers of cellular senescence observed in immortalized fibroblasts with the SLC25A46 mutation.

The work is overall very well done as far as the demonstration of the cellular and molecular effects of SLC25A46 mutations in fibroblasts derived from patients. All the appropriate controls, including siRNA and complementation approaches, have been utilized. The data relative to EMC are intriguing but quite preliminary, since no functional correlates are investigated to support the lipid transfer hypothesis. Similarly, the significance of the senescence marker expression in the immortalized cell lines from a single individual is limited.

Major points:

- 1) The paper by Abrahms et al. Nat Genet 2015 had identified mutations of SLC25A46 as responsible for mitochondrial neurological syndromes in a few families. In that study the similarity of SLC25A46 with UGO1 and its presumptive function as a component of the crista junctions and contact points in the context of MICOS interactions had been reported. Furthermore they had an in vivo model of the mutations. Therefore, this excellent work largely confirms the published observations.
- 2) The interactions with EMC are interesting, but there is no functional study supporting the hypothesis that mutations in SLC25A46 cause lipid transfer impairment and investigating the consequences.
- 3) The increase in the levels of SLC25A46 in MIC60 KD cells is counterintuitive and potentially very interesting. The mechanisms are not addressed.
- 4) The senescence phenotype should be investigated in primary (non transformed) cells and over multiple cell types, especially post-mitotic, with more direct disease relevance.
- 5) The decrease of complex IV activity does not explain why basal respiration is decreased by 50%, but maximal respiration is not. There must be some other regulation other than electron transfer that is impaired under basal (non-uncoupled) conditions, such as ATP/ADP translocation.
- 6) Hyper-fusion has been observed in fibroblasts and in other types of immortalized cells (Nat Genet 2015). The idea that despite Drp1 translocation fission fails because of loss of ER-mitochondrial interaction is intriguing, but further morphological and dynamics studies are needed to validate this hypothesis.

Referee #2 (Comments on Novelty/Model System):

The technical quality of the paper is excellent and the conclusions are clearly supported by evidence provided by a number of independent, converging results performed with high standard technical skills.

Since several mutations in the same gene have already been reported in a recent paper (Abrams et al, Nat Genet 2015), with a number of overlapping observations between the two papers, the originality of this contribution is limited, although several results, particularly those concerning the interactome of the mutant gene, are novel and interesting. The medical impact is relevant but not outstanding, because of the above considerations, and the fact that this paper reports a single case. It could be improved if some additional information were provided (for instance MRI images of the brain, details on the presence/absence of peripheral neuropathy and optic atrophy, similar to the patients reported by Abrams et al, cerebellar signs, etc.). In addition to the clinical aspects, the most relevant question raised by both papers is why the impairment of a gene encoding a protein arguably orthologue to a pro-fusion mitochondrial yeast factor, UGO1, is unexpectedly associated with a hyperfusion phenotype, suggesting an opposite role, i.e. pro-fission. However, neither Abrams et al nor Janer et al give a mechanistic contribution to explain the role of SLC25A46 and the functional divergence with its yeast orthologue (or paralogue) protein. I think an answer to these questions would be the really original contribution of the Janer et al. paper, sciencewise. In the present version, the paper is very rich in interesting findings and observations but inconclusive as far as the pathomechanism is concerned.

Referee #2 (Remarks):

This is an interesting, technically excellent, and medically relevant, paper, although its originality and novelty are somehow blunted by the results of an already published paper (Abrams et al, 2015), in which several mutations of the same gene and similar experimental observations are reported,

including the striking hyperfusion phenotype in mutant cells, the phylogenetic similarity of SLC25A46 with UGO1, some ultrastructural abnormalities, etc. However, Janer et al provide additional, relevant and convincing information about the interactors of the SLC25A46 gene product, in particular the physical and possibly functional connection with a number of proteins involved in mitodynamics and cristae architecture. Some points have to be considered:

- According to Abrams et al, the SLC25A46 cDNA does not rescue the phenotype of the delta-UGO1 strain and in fact the ablation of the former gives and opposite phenotype relative to the ablation of the latter. Therefore, there is little ground to consider the two proteins as orthologues, unless an experimentally proven hypothesis is proposed to explain these results. An alternative possibility is that the two gene products have diverged in their function, and their genes should therefore be considered as paralogous rather than orthologues.

- Abrams et al do not show specific activities of single respiratory chain complexes, therefore the finding of isolated COX defect is an original observation of Janer et al, but do the Authors have any hypothesis to explain such a specific defect? Is this reproducible by, for instance, siRNA of the gene in control cells? In addition, do the Authors have an explanation for the reduction of basal oxygen consumption, but normal maximal oxygen consumption by the Seahorse assay? Notably, this result is different from that shown by Abrams et al (fig. 4C).

- Clinical features: Leigh disease is an essentially neuropathological (or neuroimaging) entity characterized by symmetrical necrotic lesions through the brainstem and up to the basal ganglia. On the other hand, the phenotype(s) reported by Abrams et al include(s) optic atrophy, CMT-like peripheral neuropathy, but also cerebellar atrophy with symmetric lesions in the white matter surrounding both dentate nuclei, and severe atrophy of the cerebral cortex, therefore a complex syndrome combining peripheral abnormalities and lesions of the central nervous system (including optic atrophy). It would be interesting to have more details, if available, about investigations on fundus oculi/optic nerve, peripheral nervous system physiology, and brain MRI (in a supplementary figure), showing the main features concordant with the definition of Leigh disease.

- In addition to the clinical aspects, the most relevant question raised by both papers is why the impairment of a gene encoding a protein arguably orthologue to a pro-fusion mitochondrial yeast factor, UGO1, is unexpectedly associated with a hyperfusion phenotype, suggesting an opposite role, i.e. pro-fission. The work by Janer et al suggests physical interaction with pro-fusion factors, in addition to an ER complex involved in lipid exchange with mitochondria. Could the SLC25A46 protein be an inhibitor of pro-fusion factors? As recently suggested by Anand et al, OPA1 isoforms can determine opposite effects, i.e. pro-fusion or pro-fission, therefore investigation on the OPA1 isoform pattern in mutant or siRNA cells could give some useful hints. It would also be interesting to evaluate the effect on mitochondrial network, OPA1 isoforms, MFN1 and 2 amount, and DRP1 distribution in cells overexpressing SLC25A46.

In the present version, the paper is very rich in interesting findings and observations but rather inconclusive in elucidating the pathomechanism of the disease and the function of the protein.

#### Referee #3 (Remarks):

The authors describe a patient with Leigh syndrome, a fatal encephalopathy of infancy, who harboured a homozygous mutation in the nuclear-encoded mitochondrial gene SLC25A46, which they demonstrate is the human ortholog of yeast Ugo1p, a mitochondrial outer membrane-localized fusion factor. Using a set of biochemical and genetic approaches, the authors provide strong evidence that SLC25A46 is indeed the etiologic protein. Notably, the respiratory chain deficits are relatively "mild," except for complex IV. Mechanistically, they show that SLC25A46 plays a role in mitodynamics, that it interacts with the MICOS complex, and that it may be involved in lipid homeostasis.

The finding that SLC25A46 is the human homolog of Ugo1 confirms, and notably extends upon, the recent work of Abrams et al. Coupled with the excellent quality of the work performed, this paper is an important advance, in both the areas of mitochondrial disease (e.g. this is the first documented case of LS that is fundamentally divorced from deficits in "primary" OxPhos genes) and the basic biology of mitochondria. I have only minor comments.

While Ugo1 and SLC25A46 appear to be evolutionarily-related homologues, the functional similarity of the two proteins is somewhat vitiated by the fact that Ugo1 is inserted into the MOM by a non-canonical pathway involving Mim1 (Papic et al., referenced by the authors), which currently has no identified mammalian homologue. Is there any evidence that SLC25A46 insertion is similar?

The specific reduction in complex IV, coupled with a potential role for SLC25A46 in phospholipid transfer, implies a potential connection to cardiolipin (although CL is also important for complex III function, especially in supercomplexes). Any thoughts on this?

In Fig. 2A, wt SLC25A46 is a carbonate-resistant outer membrane protein. What about the mutant? If the mutation prevents membrane insertion, it might help explain the phenotypes you observe.

In Fig. S1, given the non-canonical nature of SLC25A4, it might be useful to add MTCH1 and MTCH2 to the alignments, if indeed such alignments are possible.

In Fig. S2, it was extremely difficult for me to see what was going on in the context of what the authors were trying to show. On my paper printout (but admittedly less so in the pdf itself) it was hard to tell if the blue mitochondria (and even the blue TOM20 label was hard to see) are more elongated in the patient, and whether DRP1 punctae are localized predominantly to mito tips (even in the control). It appears as if there are DRP1 punctae along the fused mitochondria in both control and patient cells (not unexpected), but with more "intra-mitochondrial" punctae in the patient (unexpected?), but without quantitation it is hard to know if this is the case, or even if DRP1 is relevant to the hyperfusion phenotype, which I assume is one of the points of the figure. Please fix or make clearer in some way (e.g. false coloring?)

1st Revision - authors' response

21 April 2016

We thank the reviewers for their insightful and positive comments on our manuscript. We believe that we have addressed the major questions relating to the molecular mechanism of action of SLC25A46. We now provide strong evidence demonstrating that the mitochondrial hyper fusion phenotype does not result from a failure to recruit or oligomerize DRP1 at the mitochondria. In addition there is an increase in the pro-fission short forms of OPA1. Thus the hyper fused phenotype cannot be explained by a lack of the pro-fission molecular machinery. We demonstrate a significant alteration in the phospholipid content in gradient-purified mitochondria from the subject, the pattern of which is similar to that described in the budding yeast when subunits of the EMC complex in the ER are deleted. We show, in addition, a very significant alteration in ER morphology, consistent with disrupted lipid transfer between mitochondria and the ER. Below we offer a point-by-point response to their queries.

Referee # 1.

- 1) We agree that the paper by Abrahms et al was excellent, but it is not our impression that they investigated the molecular mechanism of action of SLC25A46. Indeed they did not report any effects on MICOS stability, nor did they provide any detailed analysis of the ultra structural abnormalities in mitochondria, both of which we investigate in the present manuscript. They did produce a very nice vivo model in zebra fish, but as far as we can tell, this did not help in elaborating the molecular function of SLC25A46.
- 2) We agree entirely with the reviewer and now provide data from a lipidomics study, in which we identified and quantitated 72 different species of glycerophospholipids, clearly demonstrating an altered phospholipid composition in mitochondria from the subject (Figure 5). Significantly, the alterations in phospholipid content are very similar to those that have been reported in the budding yeast on disruption of the EMC complex (ref).
- 3) We agree that this is an interesting observation, and it perhaps represents some form of compensation, but this is not the focus of this manuscript, and we do not have a mechanism.

- 4) We have now investigated the senescence phenotype in a number of cell lines including primary non-immortalized human fibroblasts and a variety of tumour cell lines. We observed decreased doubling rates in all cells examined on suppression of SLC25A46, associated with upregulation of molecular markers of senescence. We show examples from the primary fibroblast cell line and from an aggressive breast cancer cell line (MCF7) in Figure. 7. We do not have post-mitotic cells available for this analysis.
- 5) We have now provided additional analyses of respiration in subject cells by examining oxygen consumption in digitonin-permeabilized fibroblasts using a conventional oxygen electrode (Fig. 1F). We show that basal oxygen consumption is indeed reduced (similar to results obtained on the Seahorse without addition of mitochondrial substrates), but there is in fact no difference between the subject and control when substrates (glutamate/malate, succinate) are added. Further, we show no difference in maximal uncoupled electron flow (on addition of CCCP) between the subject and control, in agreement with the results obtained on the Seahorse. We note that these rates are considerably higher relative to the basal rates using the conventional oxygen electrode compared to what is measured by Seahorse. In fact our experience is that the Seahorse consistently under estimates maximum electron flow. All of this suggests a problem with substrate delivery in the deficiency in basal oxygen consumption, which we mention in the text.
- 6) We have now carried out an extensive analysis of DRP1 recruitment to mitochondria, of ER morphology and, mitochondrial-ER contacts. (Figures 3 and 6). We show that steady-state levels of DRP1 are increased in subject cells, that it is efficiently recruited to mitochondria, it oligomerizes, its phosphorylation state (at Ser 616, 637) is unaltered compared to control (Supplementary figure 2), yet it does not appear to promote scission events. We also show that ER morphology is disturbed in subject cells, becoming much more sheet-like with loss of tubulation. This phenotype makes it difficult to unequivocally identify points of ER-mitochondrial contact; however, it strongly suggests an altered interaction between mitochondria and the ER.

#### Referee #2.

- 1) We thank this reviewer for the positive comments. We have now compared the clinical course of our patient with that of previously-reported patients, which were generally much milder. We fully agree that inclusion of MRI and fundus images would have enhanced the description. Unfortunately, in preparing the article we discovered that all radiological images on X-ray films in our hospital's archives were destroyed. Therefore, regrettably, no images are available. However the most important features of the MRI and the neuro-ophthalmologic examination are now described in more detail than previously (in the Supplemental material). Comparison with reported cases shows that our subject overlaps in some ways with the clinical presentation of reported cases (mild paleness of the optic disks, basal ganglion involvement, hyperactive deep tendon reflexes, and in one previously-reported patient, progressive atrophy of the hindbrain). The subject also extends the known clinical spectrum of *SLC25A46* deficiency to include Leigh disease and infantile death. We now discuss these points after the clinical description in the Supplemental material. Again we thank the reviewer because this modification provides perspective and improves the quality of the article for clinical readers.
- 2) We now provide a plausible molecular mechanism that can explain the severe disruption of mitochondrial architecture in both mammals and yeast that are seen when SLC25A46/Ugo1 function is suppressed or lost. We hasten to add that this important feature of Ugo1 loss of function has not emphasized in previous reports that only focused on mitochondrial fusion.
- 3) We respectfully disagree with this reviewer's discussion of orthologues vs. paralogues. Genes are orthologous if derived from a common ancestor (without reference to their present day function). The extensive phylogenetic analysis performed in (Haferkamp and Schmitz-Esser, 2012) clearly shows that SLC25A46 and Ugo1 form a separate branch on the phylogenetic tree, and this is a reason to consider them orthologous. Paralogues are gene duplications that co-occur in the same organism, having arisen from a gene duplication event; there is nor evidence that paralogues of either protein exist in yeast or mammals.
- 4) We do not know why we only see a rather small defect in complex IV assembly and we did not examine this in siRNA experiments in control cells. We now have done further extensive experiments exploring the oxygen consumption defect (see answer 5 above). Consistent with the assembly defect, we see a small decrease in maximum catalytic activity of complex IV measured with TMPD/ascorbate (Fig. 1F)

- 5) We have added additional clinical details as outlined in response 1 above. Unfortunately we are not able to supply the original MRI as the film was destroyed.
- 6) Indeed we investigated the OPA1 isoform pattern in subject and siRNA cell lines and show an accumulation of the short (pro-fission) isoforms (Figure 2C), and we have now done an extensive analysis of DRP1 recruitment to mitochondria as outlined in the response above.
- 7) We now provide evidence of a disturbance in the phospholipid composition of mitochondrial membranes, providing a pathomechanism for the phenotypes we observed in subject and siRNA cells.

#### Referee #3

- 1) We have not investigated the insertion of SLC25A46 into the OM, which is indeed an interesting biological question. However, the protein in the patient is very hard to detect so these studies would be difficult to pursue, and are not really the focus of the paper, which is to elucidate the molecular pathology due to loss of SLC25A46 function. The amino acid substitution in the subject apparently results in an unstable protein, and this could be due to inefficient insertion in the membrane.
- 2) We do not have an explanation for the fact that only a mild defect in complex IV is seen in the subject cells. We show that the phospholipid composition of the mitochondrial membranes is altered, but exactly how that specifically affects complex IV assembly is not yet clear. We could not quantify CL in our mass spectrometry analysis.
- 3) We did not examine the mutant, but given that it has 6 transmembrane domains it is very unlikely that it could exist as a soluble mitochondrial protein, and it does enrich with isolated mitochondria, so it is not cytosolic (Figure 3C).
- 4) We have now added the MTCH1 and MTCH2 to the alignments. Thank you for that suggestion.
- 5) We completely agree with the reviewer. We have eliminated this figure and now show a detailed analysis of DRP1 recruitment (Fig. 3).

2nd Editorial Decision

19 May 2016

Thank you for the submission of your revised manuscript to EMBO Molecular Medicine. We have now received the enclosed reports from the referees that were asked to re-assess it. As you will see the reviewers are now globally supportive and I am pleased to inform you that we will be able to accept your manuscript pending the following final amendments:

- 1) While performing our pre-publishing quality control and image screening routines, we noticed that the 1st, 3rd and 4th panels of the GFP row in Fig 2D appear actually empty. I do not refer to the lack of GFP signal, which is to be expected based on the experimental condition, but to the total absence of any background signal whatsoever. Please provide an explanation and if the case, a modified figure.
- 2) We also noticed, during the above mentioned screen, excessive contrasting in Fig. 1 and Fig. EV2. Please provide better images. In this respect, provision of source data would help (see point 6 below).
- 3) Please provide your supplemental information in a single "appendix" PDF file as per our author guidelines (<http://embomolmed.embopress.org/authorguide#expandedview>). Please make sure you adjust the callouts accordingly in the manuscript.
- 4) Please incorporate the "The Paper Explained" section into the main manuscript file (it is currently a separate document).
- 5) As per our Author Guidelines, the description of all reported data that includes statistical testing must state the name of the statistical test used to generate error bars and P values, the number (n) of independent experiments underlying each data point (not replicate measures of one sample), and the

actual P value for each test (not merely 'significant' or ' $P < 0.05$ ').

6) We encourage the publication of source data, particularly for electrophoretic gels and blots, with the aim of making primary data more accessible and transparent to the reader. Would you be willing to provide a PDF file per figure that contains the original, uncropped and unprocessed scans of all or at least the key gels used in the manuscript? The PDF files should be labeled with the appropriate figure/panel number, and should have molecular weight markers; further annotation may be useful but is not essential. The PDF files will be published online with the article as supplementary "Source Data" files. If you have any questions regarding this just contact me.

Please submit your revised manuscript within two weeks. I look forward to seeing a revised form of your manuscript as soon as possible.

\*\*\*\*\* Reviewer's comments \*\*\*\*\*

Referee #1 (Comments on Novelty/Model System):

The revised manuscript has introduced new results on phospholipids alterations in the mutant cells. It has also provided additional information on the various cell types that extend the original results obtained in immortalized fibroblasts. The novelty issue on the homology with UGO1 and the role in disease is balanced by the careful and convincing experiments that investigate the functional role of SLC25A46.

Referee #2 (Comments on Novelty/Model System):

The paper has improved in the technical quality and quality of results. The analysis of the lipidome carried out by the Authors suggests a possible mechanism to solve the discrepancy between the effect of UGO1 ablation in yeast and the (opposite) effect of mutations in SLC25A46 in humans. Although this remains a speculative argument, the scientific information provided by this paper is relevant and warrants interesting and challenging work for the future.

Referee #3 (Remarks):

No comments.

2nd Revision - authors' response

02 June 2016

Thank you for the provisional acceptance of our manuscript EMM-2015-06159-V2.

Answers to your queries appear below.

- (1) Yes these were empty panels, and we should have indicated this. We have now removed them and left empty spaces. We did not think it useful to provide a picture of the background noise, which would simply appear black.
- (2) We have now provided better images, and the source data files for all gels and blots.
- (3) We have provided the supplemental data as a single PDF
- (4) We have incorporated the paper explained into the main manuscript.
- (5) We have now stated the statistical test used and the significance level in all instances.
- (6) We have provided the source data for the major figures with gels/blots.



I hope that you will now find the paper suitable for publication in EMM.

**YOU MUST COMPLETE ALL CELLS WITH A PINK BACKGROUND ↓**

PLEASE NOTE THAT THIS CHECKLIST WILL BE PUBLISHED ALONGSIDE YOUR PAPER

|                            |
|----------------------------|
| Corresponding Author Name: |
| Journal Submitted to:      |
| Manuscript Number:         |

### Reporting Checklist For Life Sciences Articles (Rev. July 2015)

This checklist is used to ensure good reporting standards and to improve the reproducibility of published results. These guidelines are consistent with the Principles and Guidelines for Reporting Preclinical Research issued by the NIH in 2014. Please follow the journal's authorship guidelines in preparing your manuscript.

## A- Figures

### 1. Data

**The data shown in figures should satisfy the following conditions:**

- the data were obtained and processed according to the field's best practice and are presented to reflect the results of the experiments in an accurate and unbiased manner.
- figure panels include only data points, measurements or observations that can be compared to each other in a scientifically meaningful way.
- graphs include clearly labeled error bars for independent experiments and sample sizes. Unless justified, error bars should not be shown for technical replicates.
- if  $n < 5$ , the individual data points from each experiment should be plotted and any statistical test employed should be justified
- Source Data should be included to report the data underlying graphs. Please follow the guidelines set out in the author ship guidelines on Data Presentation.

### 2. Captions

**Each figure caption should contain the following information, for each panel where they are relevant:**

- a specification of the experimental system investigated (eg cell line, species name).
- the assay(s) and method(s) used to carry out the reported observations and measurements
- an explicit mention of the biological and chemical entity(ies) that are being measured.
- an explicit mention of the biological and chemical entity(ies) that are altered/varied/perturbed in a controlled manner.
- the exact sample size (n) for each experimental group/condition, given as a number, not a range;
- a description of the sample collection allowing the reader to understand whether the samples represent technical or biological replicates (including how many animals, litters, cultures, etc.).
- a statement of how many times the experiment shown was independently replicated in the laboratory.
- definitions of statistical methods and measures:
  - common tests, such as t-test (please specify whether paired vs. unpaired), simple  $\chi^2$  tests, Wilcoxon and Mann-Whitney tests, can be unambiguously identified by name only, but more complex techniques should be described in the methods section;
  - are tests one-sided or two-sided?
  - are there adjustments for multiple comparisons?
  - exact statistical test results, e.g., P values = x but not P values < x;
  - definition of 'center values' as median or average;
  - definition of error bars as s.d. or s.e.m.

Any descriptions too long for the figure legend should be included in the methods section and/or with the source data.

Please ensure that the answers to the following questions are reported in the manuscript itself. We encourage you to include a specific subsection in the methods section for statistics, reagents, animal models and human subjects.

**In the pink boxes below, provide the page number(s) of the manuscript draft or figure legend(s) where the information can be located. Every question should be answered. If the question is not relevant to your research, please write NA (non applicable).**

## B- Statistics and general methods

Please fill out these boxes ↓ (Do not worry if you cannot see all your text once you press return)

|                                                                                                                                                                                         |                                                                                                                                                                 |
|-----------------------------------------------------------------------------------------------------------------------------------------------------------------------------------------|-----------------------------------------------------------------------------------------------------------------------------------------------------------------|
| 1.a. How was the sample size chosen to ensure adequate power to detect a pre-specified effect size?                                                                                     | Where we expected a large difference between experiments and controls we used above the minimum number of biological replicates to carry out stastical analyses |
| 1.b. For animal studies, include a statement about sample size estimate even if no statistical methods were used.                                                                       | Not applicable                                                                                                                                                  |
| 2. Describe inclusion/exclusion criteria if samples or animals were excluded from the analysis. Were the criteria pre-established?                                                      | not applicable                                                                                                                                                  |
| 3. Were any steps taken to minimize the effects of subjective bias when allocating animals/samples to treatment (e.g. randomization procedure)? If yes, please describe.                | not applicable                                                                                                                                                  |
| For animal studies, include a statement about randomization even if no randomization was used.                                                                                          | not applicable                                                                                                                                                  |
| 4.a. Were any steps taken to minimize the effects of subjective bias during group allocation or/and when assessing results (e.g. blinding of the investigator)? If yes please describe. | not applicable                                                                                                                                                  |
| 4.b. For animal studies, include a statement about blinding even if no blinding was done                                                                                                | not applicable                                                                                                                                                  |
| 5. For every figure, are statistical tests justified as appropriate?                                                                                                                    | yes                                                                                                                                                             |
| Do the data meet the assumptions of the tests (e.g., normal distribution)? Describe any methods used to assess it.                                                                      | yes, test for deviation from normal distribution                                                                                                                |
| Is there an estimate of variation within each group of data?                                                                                                                            | yes                                                                                                                                                             |
| Is the variance similar between the groups that are being statistically compared?                                                                                                       | yes                                                                                                                                                             |

## USEFUL LINKS FOR COMPLETING THIS FORM

<http://www.antibodypedia.com>  
<http://1degreebio.org>  
<http://www.equator-network.org/reporting-guidelines/improving-bioscience-research-repo>

<http://grants.nih.gov/grants/olaw/olaw.htm>  
<http://www.mrc.ac.uk/Ourresearch/Ethicsresearchguidance/Useofanimals/index.htm>  
<http://ClinicalTrials.gov>  
<http://www.consort-statement.org>  
<http://www.consort-statement.org/checklists/view/32-consort/66-title>

<http://www.equator-network.org/reporting-guidelines/reporting-recommendations-for-tur>

<http://datadryad.org>

<http://figshare.com>

<http://www.ncbi.nlm.nih.gov/gap>

<http://www.ebi.ac.uk/ega>

<http://biomodels.net/>

<http://biomodels.net/miriam/>  
<http://fiji.biochem.sun.ac.za>  
[http://oba.od.nih.gov/biosecurity/biosecurity\\_documents.html](http://oba.od.nih.gov/biosecurity/biosecurity_documents.html)  
<http://www.selectagents.gov/>

### C- Reagents

|                                                                                                                                                                                                                                                                                                                              |                                                |
|------------------------------------------------------------------------------------------------------------------------------------------------------------------------------------------------------------------------------------------------------------------------------------------------------------------------------|------------------------------------------------|
| 6. To show that antibodies were profiled for use in the system under study (assay and species), provide a citation, catalog number and/or clone number, supplementary information or reference to an antibody validation profile. e.g., Antibodypedia (see link list at top right), 1DegreeBio (see link list at top right). | done                                           |
| 7. Identify the source of cell lines and report if they were recently authenticated (e.g., by STR profiling) and tested for mycoplasma contamination.                                                                                                                                                                        | all cell lines routinely tested for mycoplasma |

\* for all hyperlinks, please see the table at the top right of the document

### D- Animal Models

|                                                                                                                                                                                                                                                                                                                                                                                    |                |
|------------------------------------------------------------------------------------------------------------------------------------------------------------------------------------------------------------------------------------------------------------------------------------------------------------------------------------------------------------------------------------|----------------|
| 8. Report species, strain, gender, age of animals and genetic modification status where applicable. Please detail housing and husbandry conditions and the source of animals.                                                                                                                                                                                                      | not applicable |
| 9. For experiments involving live vertebrates, include a statement of compliance with ethical regulations and identify the committee(s) approving the experiments.                                                                                                                                                                                                                 | not applicable |
| 10. We recommend consulting the ARRIVE guidelines (see link list at top right) (PLoS Biol. 8(6), e1000412, 2010) to ensure that other relevant aspects of animal studies are adequately reported. See author guidelines, under 'Reporting Guidelines'. See also: NIH (see link list at top right) and MRC (see link list at top right) recommendations. Please confirm compliance. | not applicable |

### E- Human Subjects

|                                                                                                                                                                                                                                                                                                                    |                                                 |
|--------------------------------------------------------------------------------------------------------------------------------------------------------------------------------------------------------------------------------------------------------------------------------------------------------------------|-------------------------------------------------|
| 11. Identify the committee(s) approving the study protocol.                                                                                                                                                                                                                                                        | Ethics committee Montreal Neurological Hospital |
| 12. Include a statement confirming that informed consent was obtained from all subjects and that the experiments conformed to the principles set out in the WMA Declaration of Helsinki and the Department of Health and Human Services Belmont Report.                                                            | Informed consent was obtained                   |
| 13. For publication of patient photos, include a statement confirming that consent to publish was obtained.                                                                                                                                                                                                        | not applicable                                  |
| 14. Report any restrictions on the availability (and/or on the use) of human data or samples.                                                                                                                                                                                                                      | none                                            |
| 15. Report the clinical trial registration number (at ClinicalTrials.gov or equivalent), where applicable.                                                                                                                                                                                                         | not applicable                                  |
| 16. For phase II and III randomized controlled trials, please refer to the CONSORT flow diagram (see link list at top right) and submit the CONSORT checklist (see link list at top right) with your submission. See author guidelines, under 'Reporting Guidelines'. Please confirm you have submitted this list. | not applicable                                  |
| 17. For tumor marker prognostic studies, we recommend that you follow the REMARK reporting guidelines (see link list at top right). See author guidelines, under 'Reporting Guidelines'. Please confirm you have followed these guidelines.                                                                        | not applicable                                  |

### F- Data Accessibility

|                                                                                                                                                                                                                                                                                                                                                                                                                                                                                                                                                                                                                                                                                                  |                        |
|--------------------------------------------------------------------------------------------------------------------------------------------------------------------------------------------------------------------------------------------------------------------------------------------------------------------------------------------------------------------------------------------------------------------------------------------------------------------------------------------------------------------------------------------------------------------------------------------------------------------------------------------------------------------------------------------------|------------------------|
| 18. Provide accession codes for deposited data. See author guidelines, under 'Data Deposition'.<br>Data deposition in a public repository is mandatory for:<br>a. Protein, DNA and RNA sequences<br>b. Macromolecular structures<br>c. Crystallographic data for small molecules<br>d. Functional genomics data<br>e. Proteomics and molecular interactions                                                                                                                                                                                                                                                                                                                                      | In progress at Clinvar |
| 19. Deposition is strongly recommended for any datasets that are central and integral to the study; please consider the journal's data policy. If no structured public repository exists for a given data type, we encourage the provision of datasets in the manuscript as a Supplementary Document (see author guidelines under 'Expanded View' or in unstructured repositories such as Dryad (see link list at top right) or Figshare (see link list at top right).                                                                                                                                                                                                                           | not applicable         |
| 20. Access to human clinical and genomic datasets should be provided with as few restrictions as possible while respecting ethical obligations to the patients and relevant medical and legal issues. If practically possible and compatible with the individual consent agreement used in the study, such data should be deposited in one of the major public access-controlled repositories such as dbGAP (see link list at top right) or EGA (see link list at top right).                                                                                                                                                                                                                    | not applicable         |
| 21. As far as possible, primary and referenced data should be formally cited in a Data Availability section. Please state whether you have included this section.<br><br>Examples:<br><b>Primary Data</b><br>Wetmore KM, Deutschbauer AM, Price MN, Arkin AP (2012). Comparison of gene expression and mutant fitness in <i>Shewanella oneidensis</i> MR-1. Gene Expression Omnibus GSE39462<br><b>Referenced Data</b><br>Huang J, Brown AF, Lei M (2012). Crystal structure of the TRBD domain of TERT and the CR4/5 of TR. Protein Data Bank 4O26<br>AP-MS analysis of human histone deacetylase interactions in CEM-T cells (2013). PRIDE PXD000208                                           | not applicable         |
| 22. Computational models that are central and integral to a study should be shared without restrictions and provided in a machine-readable form. The relevant accession numbers or links should be provided. When possible, standardized format (SBML, CellML) should be used instead of scripts (e.g. MATLAB). Authors are strongly encouraged to follow the MIRIAM guidelines (see link list at top right) and deposit their model in a public database such as Biomodels (see link list at top right) or JWS Online (see link list at top right). If computer source code is provided with the paper, it should be deposited in a public repository or included in supplementary information. | not applicable         |

### G- Dual use research of concern

|                                                                                                                                                                                                                                                                                               |    |
|-----------------------------------------------------------------------------------------------------------------------------------------------------------------------------------------------------------------------------------------------------------------------------------------------|----|
| 23. Could your study fall under dual use research restrictions? Please check biosecurity documents (see link list at top right) and list of select agents and toxins (APHIS/CDC) (see link list at top right). According to our biosecurity guidelines, provide a statement only if it could. | no |
|-----------------------------------------------------------------------------------------------------------------------------------------------------------------------------------------------------------------------------------------------------------------------------------------------|----|
